# Supplementary material for: Energy framework and solubility: a new predictive model in the evaluation of the structure–property relationship of pharmaceutical solid forms
Source: Royal Society of Chemistry journal article supplement (doi:10.1039/d2ce00818a), 2022-01-01
Supplement: d2ce00818a1.pdf [file d2ce00818a1.pdf]

## *SUPPORTING INFORMATION*

### **Energy framework and solubility: a new physicochemical approach in the evaluation of the structure-property of pharmaceutical solid forms**

Jennifer T. J. Freitas<sup>a</sup>, Luan F. Diniz<sup>a,b</sup>, Daniele S. Gomes<sup>a</sup>, Pedro M. A. F. de Paula<sup>a</sup>, Sérgio H. A. de Castro<sup>a</sup>, Larissa S. Martins<sup>a</sup>, Daniely F. Silva<sup>a</sup>, Ana L. M. Horta<sup>a</sup>, Felipe A. S. Guimarães<sup>a</sup>, Victória F. M. Calisto<sup>a</sup>, Renata Diniz<sup>a\*</sup>

<sup>a</sup>Grupo de Cristalografia Química (GCQ), Departamento de Química, Instituto de Ciências Exatas, Universidade Federal de Minas Gerais, 31270-901-Belo Horizonte, MG, Brazil.

<sup>b</sup>Laboratório de Controle de Qualidade de Medicamentos e Cosméticos, Departamento de Produtos Farmacêuticos, Faculdade de Farmácia, Universidade Federal de Minas Gerais, 31270-901, Belo Horizonte, MG, Brazil.

\*E-mail: [dinizr@ufmg.br](mailto:dinizr@ufmg.br)

## COMPLEMENTARY FIGURES AND TABLES

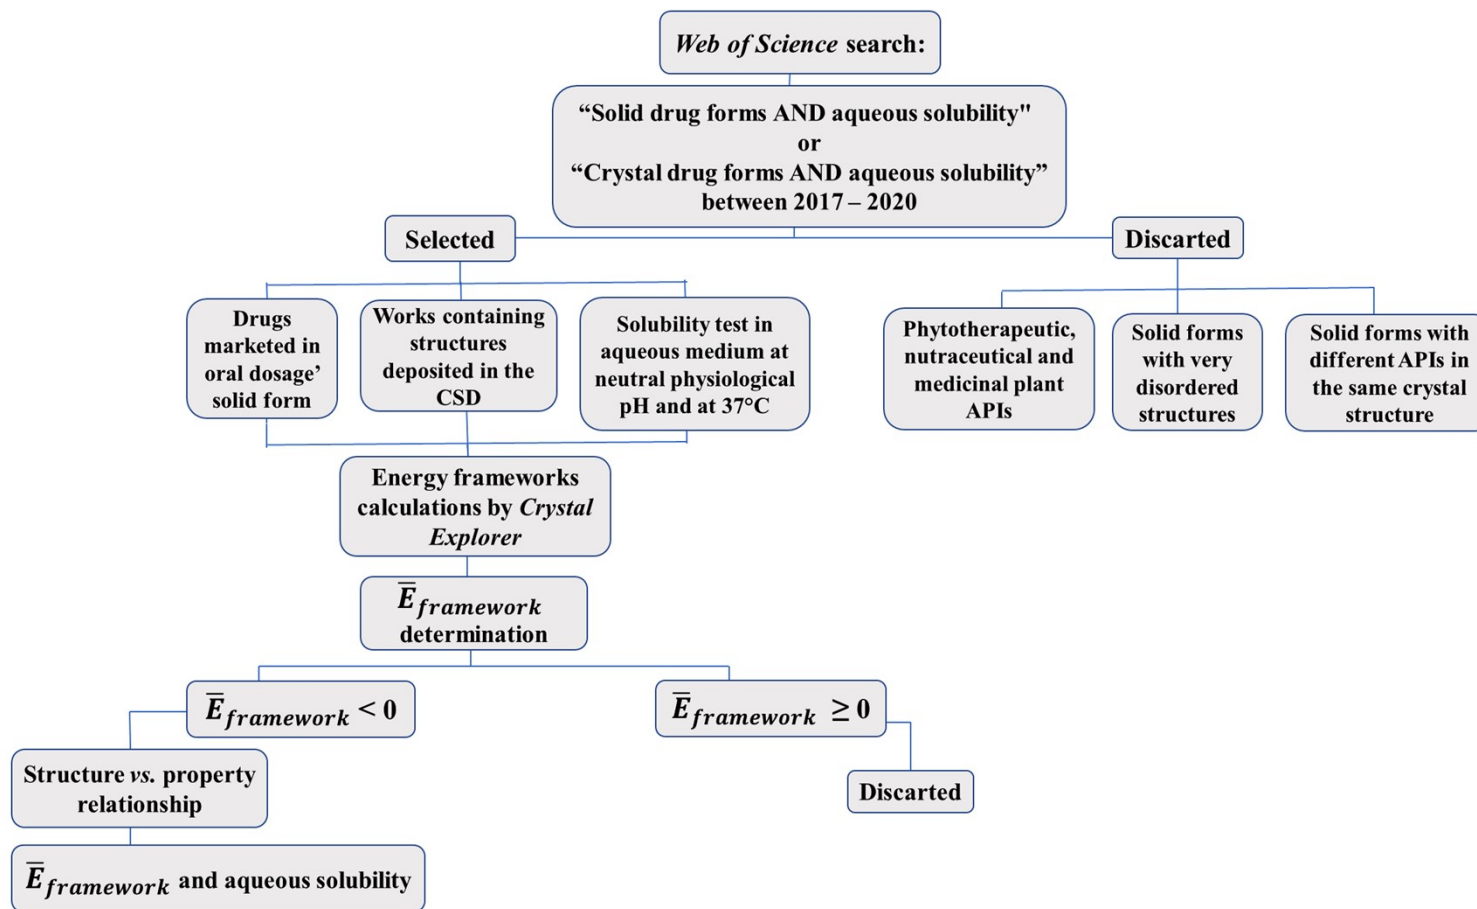

**Figure S1.** Steps of the methodology utilized in this work.

**Table S1.** Different solid forms selected for the analysis of structure-property correlation.

| Drug                        | Solid form                    | Type of solid | Aqueous solubility (mg mL <sup>-1</sup> )* | HF $E_{framework}$ (KJ mol <sup>-1</sup> ) | B3LYP $E_{framework}$ (KJ mol <sup>-1</sup> ) | References |
|-----------------------------|-------------------------------|---------------|--------------------------------------------|--------------------------------------------|-----------------------------------------------|------------|
| <b>Acetazolamide (ACA)</b>  | ACA-form I                    | P             | 0.74                                       | -27.44                                     | -24.05                                        | 1-2        |
|                             | ACA-proline                   | C             | 2.64                                       | -15.5                                      | -11.92                                        |            |
|                             | ACA-theophylline              | C             | 2.18                                       | -15.71                                     | -16.33                                        |            |
| <b>Albendazole (ABZ)</b>    | ABZ-form I                    | P             | 0.0033                                     | -22.03                                     | -22.04                                        | 3          |
|                             | ABZ- hydrochloride            | S             | 0.1                                        | -11.09                                     | -11.19                                        |            |
| <b>Apatinib (APA)</b>       | APA- saccharinate             | S             | 0.255                                      | -9.58                                      | -14.31                                        | 4          |
|                             | APA-sebacylate                | S             | 1.667                                      | -14.84                                     | -12.49                                        |            |
|                             | APA-succinate hydrated        | S             | 0.989                                      | -9.30                                      | -13.94                                        |            |
| <b>Apremilast (AP)</b>      | AP                            | P             | 0.004                                      | -29.42                                     | -25.07                                        | 5          |
| <b>Cilostazol (CLZ)</b>     | CLZ                           | P             | 0.0074                                     | -28.56                                     | -27.3                                         | 6          |
|                             | CLZ-4-hydroxybenzoic acid     | C             | 0.0703                                     | -23.62                                     | -23.08                                        |            |
|                             | CLZ-2,4-dihydroxybenzoic acid | C             | 0.1073                                     | -23.79                                     | -21.17                                        |            |
|                             | CLZ-2,5-dihydroxybenzoic acid | C             | 0.25382                                    | -28.37                                     | -26.37                                        |            |
| <b>Chlorothiazide (CTZ)</b> | CTZ-form 1                    | P             | 0.018                                      | -28.07                                     | -22.14                                        | 7          |
|                             | CTZ-1,2-di(4-pyridyl)ethylene | C             | 0.028                                      | -18.38                                     | -12.27                                        |            |
| <b>Doxazosin (DXZ)</b>      | DXZ - free-base               | P             | 0.00006                                    | -30.3                                      | -28.36                                        | 8          |
|                             | DXZ- mesylate polymorph A     | S             | 0.0367                                     | -12.14                                     | -12.86                                        |            |
|                             | DXZ- mesylate hydrate         | S             | 0.07434                                    | -16.44                                     | -14.08                                        |            |
| <b>Desloratadine (DES)</b>  | DES                           | P             | 0.32                                       | -20.83                                     | -20.21                                        | 9          |

|                            |                                                    |   |          |        |         |       |
|----------------------------|----------------------------------------------------|---|----------|--------|---------|-------|
| <b>Dipfluzine (DF)</b>     | DF-fumarate                                        | S | 0.01911  | -17.67 | -20.25  | 10    |
| <b>Entacapone (ETP)</b>    | ETP                                                | P | 0.08     | -31.73 | -29.73  | 11    |
| <b>Epalrestat (EPR)</b>    | EPR                                                | P | 0.002956 | -22.47 | -21.27  | 12-13 |
|                            | EPR-caffeine                                       | C | 0.004557 | -15.78 | -19.05  |       |
| <b>Febuxostat (FEB)</b>    | FEB- isonicotinamide                               | C | 0.0131   | -18.78 | -18.73  | 14-16 |
|                            | HFEB-di-2-pyridylamine                             | S | 0.1419   | -7.52  | -8.78   |       |
|                            | FEB                                                | P | 0.0108   | -20.89 | -20.00  |       |
| <b>Furosemide (FSM)</b>    | FSM-form 1                                         | P | 0.081    | -10.83 | -9.07   | 17-18 |
|                            | FSM-5-fluorocytosine monohydrated                  | C | 0.22     | -22.96 | -21.92  |       |
|                            | FSM-triethanolamine                                | S | 4.3      | -7.75  | -10.18  |       |
| <b>Glibenclamide (GCM)</b> | GCM                                                | P | 0.0101   | -27.99 | -25.72  | 19    |
| <b>Glimepiride (GLIM)</b>  | GLIM- form I                                       | P | 0.0464   | -35.63 | -32.73  | 20    |
|                            | GLIM- form II                                      | P | 0.133    | -37.47 | -33.67  |       |
| <b>Indomethacin (INC)</b>  | INC-DL-proline hydrate                             | C | 0.00377  | -24.81 | -25.32  | 21-22 |
|                            | INC- polymorph $\gamma$                            | P | 0.00186  | -26.56 | -24.99  |       |
|                            | (INC) <sub>2</sub> -(DPEN) <sub>2</sub> -Dihydrate | C | 0.3598   | -1.83  | -4.28   |       |
| <b>Ketoconazole (KTZ)</b>  | KTZ                                                | P | 0.012    | -31.78 | -30.82  | 23    |
|                            | KTZ-2,4 dihydroxybenzoic acid                      | C | 0.1793   | -17.11 | -16.784 |       |
|                            | KTZ-3,4-dihydroxybenzoic acid                      | C | 0.4858   | -24.12 | -21.83  |       |
|                            | KTZ- <i>trans</i> -4-hydroxycinnamic acid          | C | 0.0815   | -26.80 | -24.55  |       |
| <b>Leflunomide (LEF)</b>   | LEF-form I                                         | P | 0.03165  | -26.74 | -24.85  | 24    |
|                            | LEF-3-hydroxybenzoic acid                          | C | 0.03658  | -20.46 | -18.08  |       |
|                            | LEF-pyrogallol                                     | C | 0.04463  | -10.93 | -11.27  |       |

|                              |                               |     |        |        |        |    |
|------------------------------|-------------------------------|-----|--------|--------|--------|----|
| <b>Lenalidomide (LEN)</b>    | LEN-hemihydrate               | P/H | 0.65   | -11.89 | -10.85 | 25 |
|                              | LEN-acesulfame                | S   | 1.35   | -18.62 | -17.39 |    |
| <b>Riluzole (RZ)</b>         | RZ                            | P   | 0.35   | -13.39 | -12.86 | 26 |
|                              | RZ-glutaric acid              | C   | 0.62   | -18.87 | -17.38 |    |
|                              | RZ-sorbic acid                | C   | 1.98   | -10.64 | -10.82 |    |
|                              | RZ-malonic acid               | S   | 3.21   | -10.39 | -10.83 |    |
| <b>Sulfametoxazole (SMZ)</b> | SMZ-form I                    | P   | 0.705  | -27.84 | -23.42 | 27 |
|                              | SMZ-form II                   | P   | 1.447  | -23.91 | -20.74 |    |
|                              | SMZ-benzamidine               | S   | 3.289  | -6.56  | -7.11  |    |
|                              | SMZ-1,2-di(4-pyridyl)ethylene | C   | 0.334  | -12.43 | -10.50 |    |
| <b>Teriflunomide (TFM)</b>   | TFM                           | P   | 0.637  | -9.93  | -8.66  | 28 |
|                              | TFM-diethanolamine            | S   | 1.785  | -7.16  | -7.62  |    |
|                              | TFM-monoethanolamine          | S   | 4.202  | -11.68 | -9.97  |    |
| <b>Telmisartan (TEL)</b>     | TEL                           | P   | 0.07   | -39.72 | -40.75 | 29 |
|                              | TEL-gentisic acid             | C   | 0.26   | -21.62 | -23.71 |    |
| <b>Tinidazole (TNZ)</b>      | TMZ-salicylic acid            | C   | 3.807  | -20.11 | -17.16 | 30 |
| <b>Zonisamide (ZNS)</b>      | ZNS                           | P   | 0.8466 | -24.42 | -20.12 | 31 |
|                              | ZNS-caffeine                  | C   | 0.7418 | -7.00  | -9.4   |    |

For better visualization, the data were grouped by drug and in alphabetical order.

P=pure; C=cocrystal; S=salt and H=hydrate

\* Solubility data were standardized in mg mL<sup>-1</sup>.

Calculation:

$$\bar{E}_{framework} = \frac{\sum (E_{total} \times n^{\circ} \text{interactions' type})}{N^{\circ} \text{Total interactions}}$$

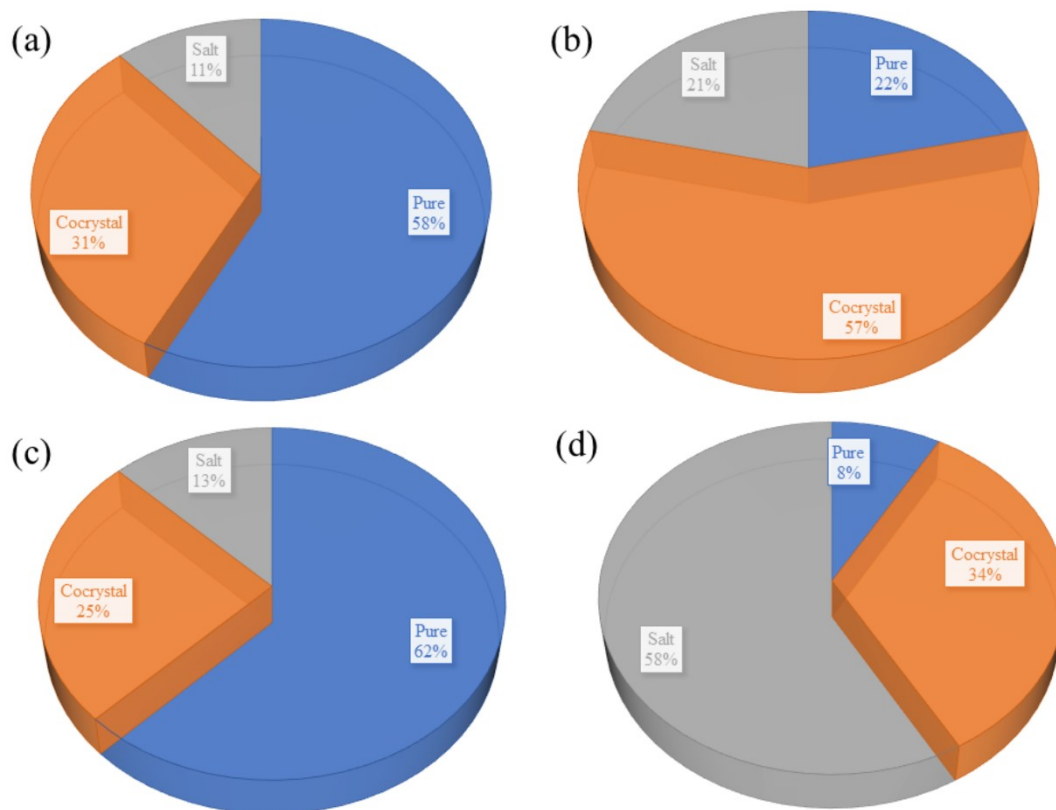

**Figure S2.** Distribution of the 60 solid forms selected in the four solubility ranges: (a) less than 0.10 mg mL<sup>-1</sup>; (b) from 0.10 to 0.50 mg mL<sup>-1</sup>; (c) from 0.50 to 1.00 mg mL<sup>-1</sup> and (d) from 1.00 to 5.00 mg mL<sup>-1</sup>.

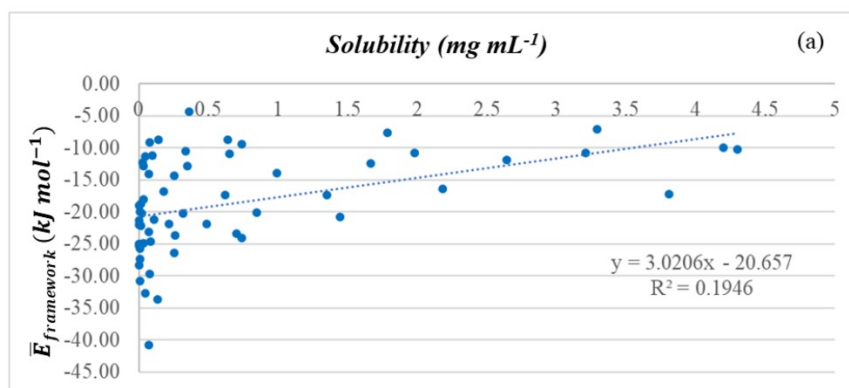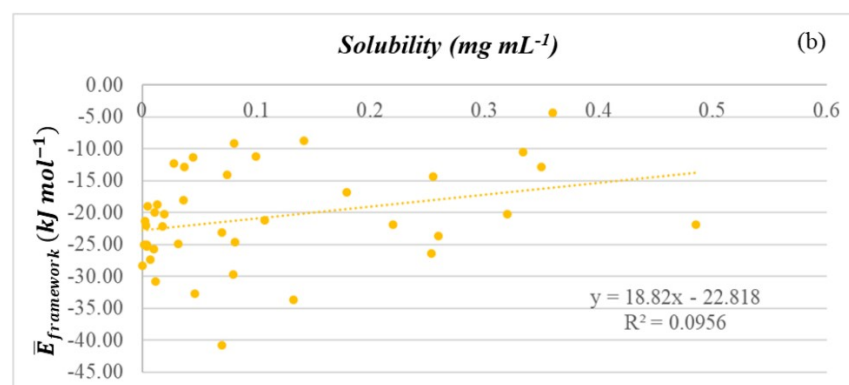

**Figure S3.** Linear representation of solubility and average of energy framework ( $E_{framework}$ ) for 60 solid forms investigated a) showing the dispersion of points a) within the entire range of solubility studied ( $0.00006 - 4.3 \text{ mg mL}^{-1}$ ) and b) only in the range of greatest variability between the points ( $\leq 0.5 \text{ mg mL}^{-1}$ ). The energy values were obtained at the B3LYP/6-31G(d,p) level.

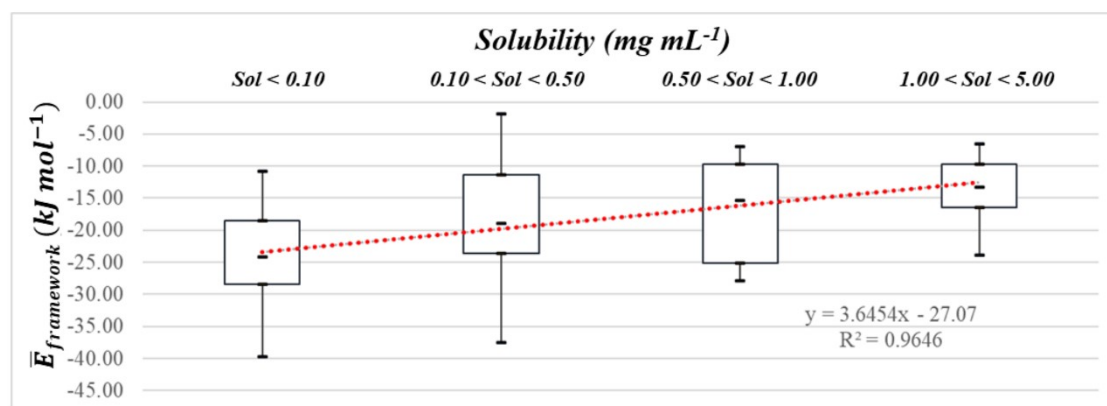

**Figure S4.** Box plot representation of solubility and average of energy framework ( $E_{framework}$ ) for 60 solid forms investigated. The energy values were obtained at the HF/3-21G level.

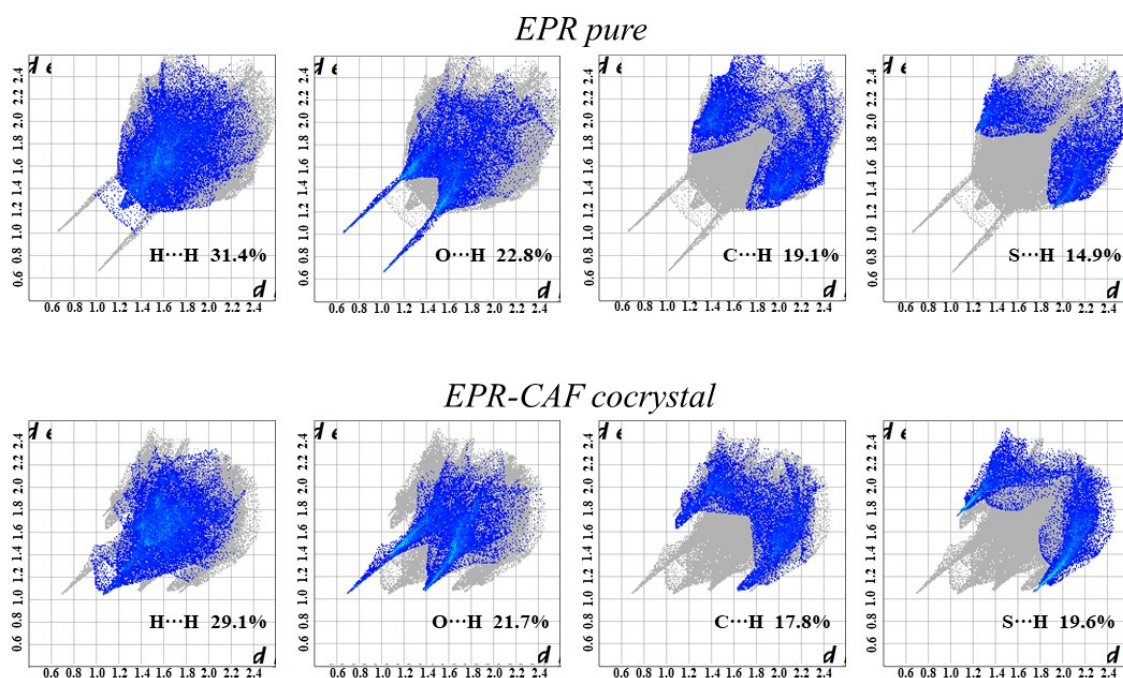

**Figure S5.** Partial fingerprint plots showing the percentual contributions of the main intermolecular contacts to the Hirshfeld surface area of the forms EPR (pure) and EPR-CAF cocrystal.

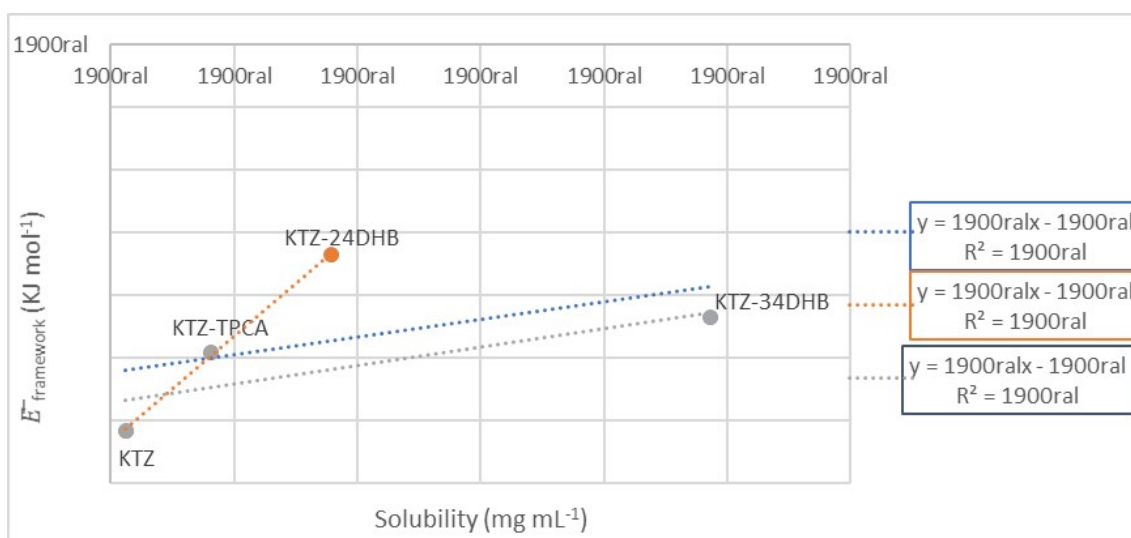

**Figure S6.** Correlation between the  $E_{framework}$  and aqueous solubility for the four solid forms of ketoconazole studied. The blue dotted line corresponds to the linear trend between the 4 points; the orange dotted line represents the linear trend for the first three points (KTZ; KTZ-TPCA and KTZ-24DHB) and the gray dotted line corresponds to the linear trend between KTZ; KTZ-TPCA and KTZ-34DHB).

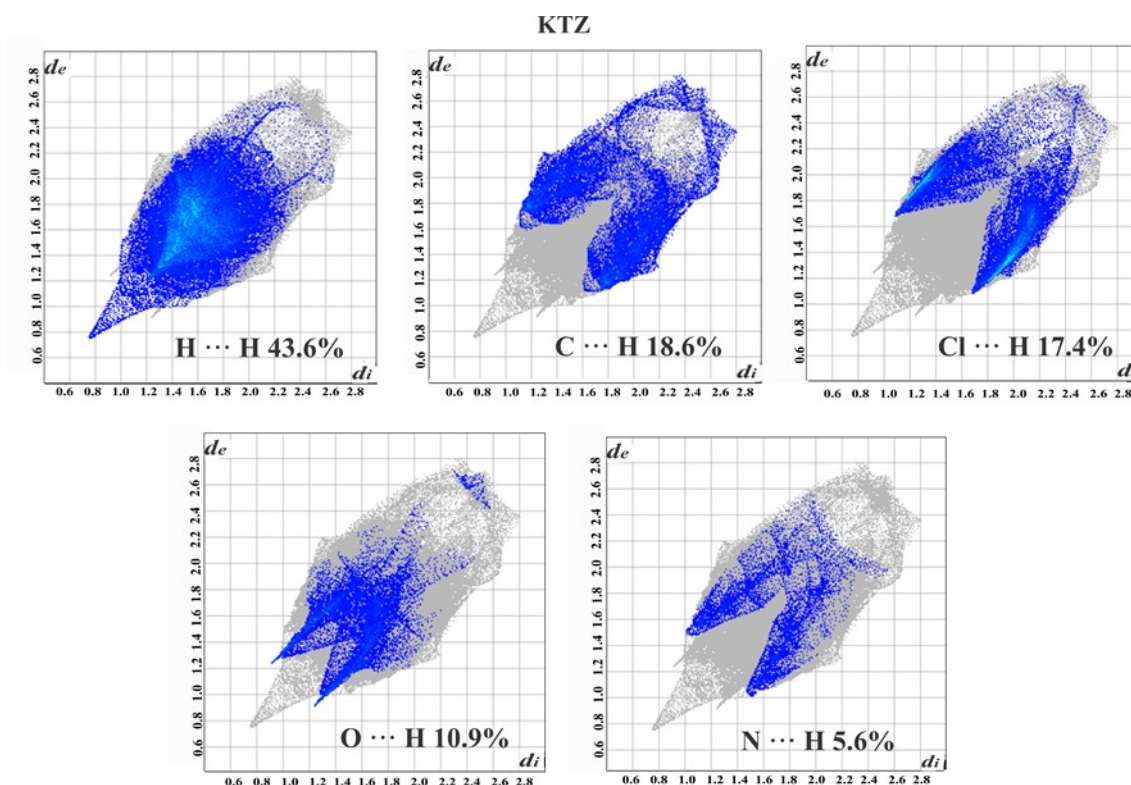

**Figure S7.** 2-D fingerprint plots of the KTZ structure showing the main contributions from specific pairs of atom-types.



### KTZ- TPCA

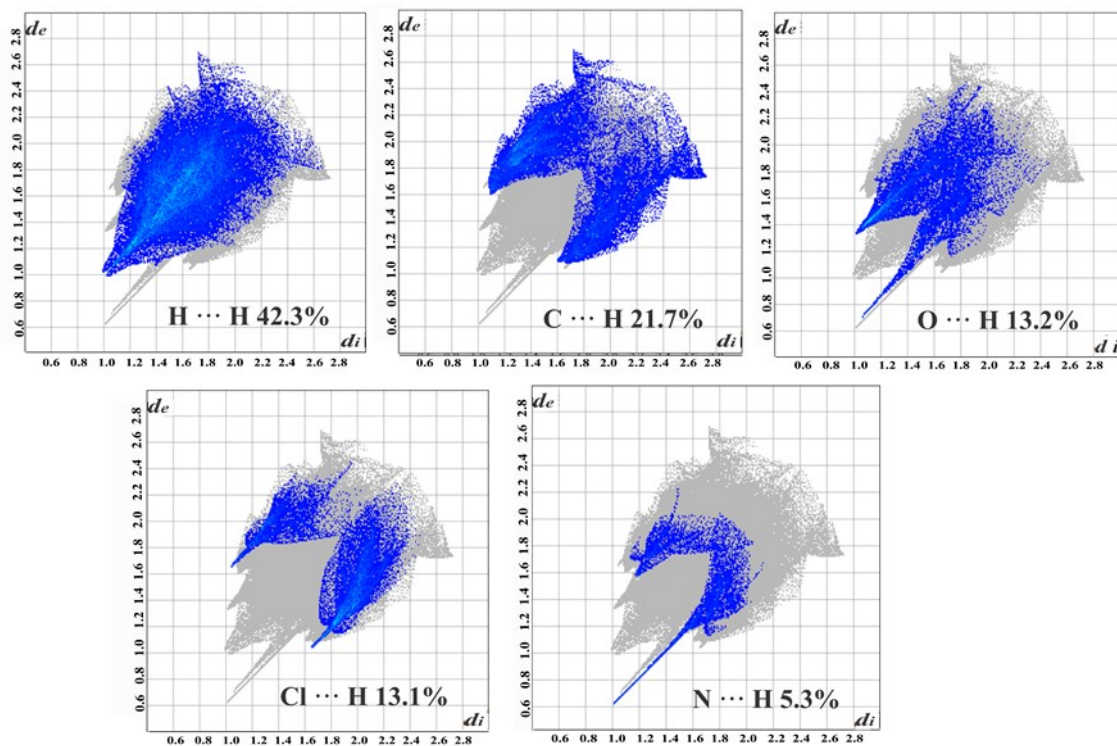

**Figure S8.** 2-D fingerprint plots of the KTZ-TPCA structure showing the main contributions from specific pairs of atom-types.

## KTZ- 24DHB

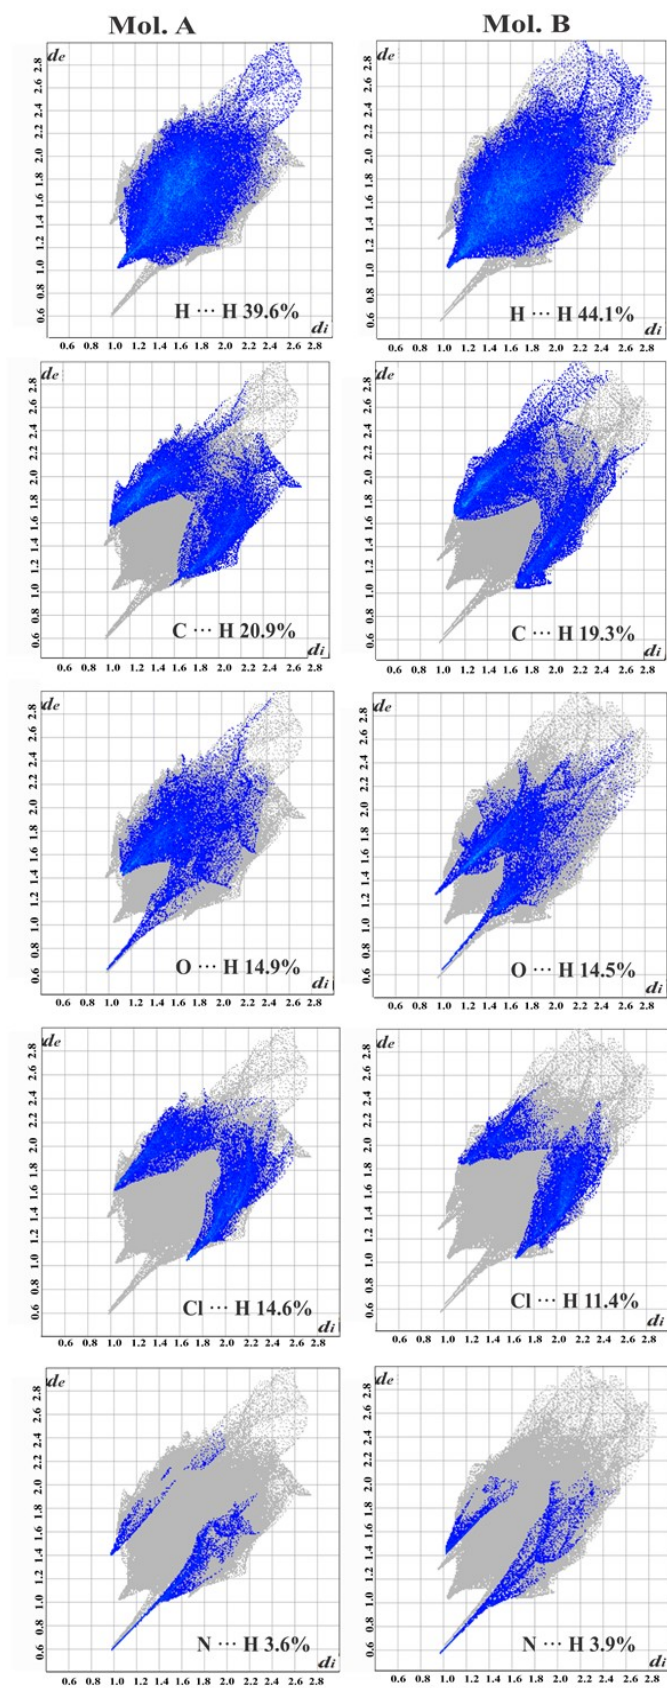

**Figure S9.** 2-D fingerprint plots for a) molecule A and b) molecule B of the KTZ-24DHB structure showing the main contributions from specific pairs of atom-types.

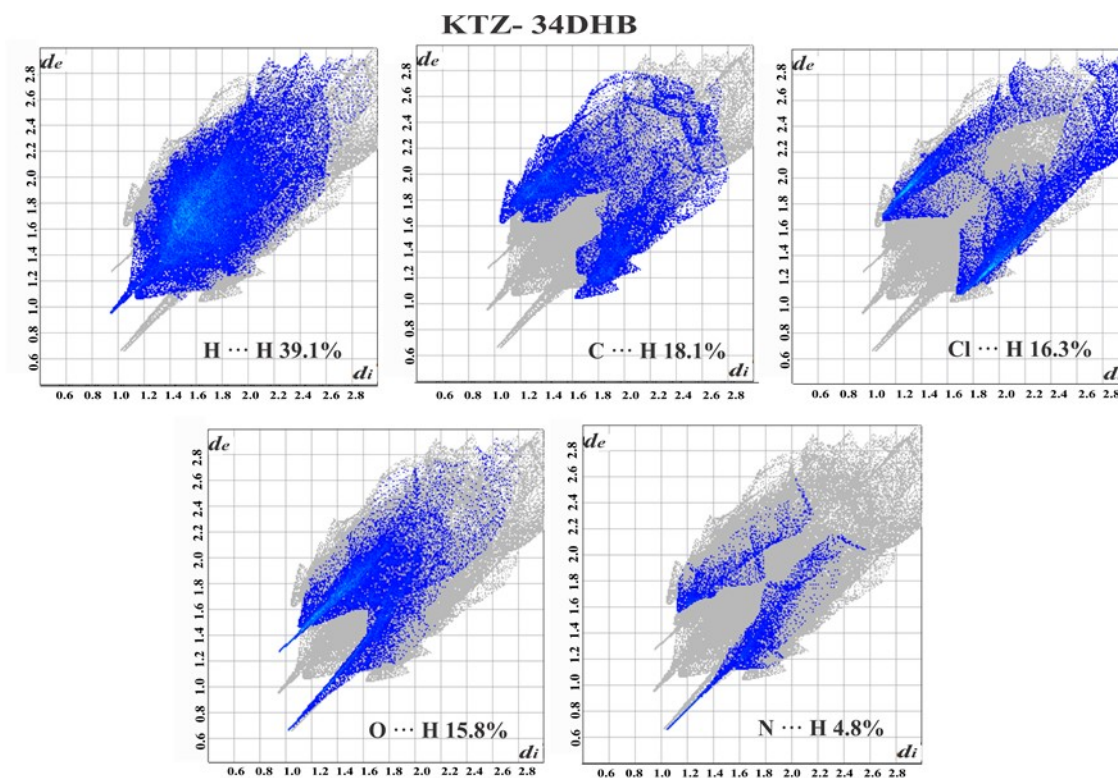

**Figure S10.** 2-D fingerprint plots of the KTZ-34DHB structure showing the main contributions from specific pairs of atom-types.

## References

- 1 Y. X. Zhang, L. Y. Wang, J. K. Dai, F. Liu, Y. T. Li, Z. Y. Wu and C. W. Yan, *J. Mol. Struct.*, 2019, **1184**, 225–232.
- 2 Y. Song, L. Y. Wang, F. Liu, Y. T. Li, Z. Y. Wu and C. W. Yan, *CrystEngComm.*, 2019, **21**, 3064–3073.
- 3 A. Bongioanni, M. S. Bueno, J. Abraham-Miranda, A. K. Chattah, A. P. Ayala, M. R. Longhi and C. Garnerio, *Cryst. Growth Des.*, 2019, **19**, 4538–4545.
- 4 B. Zhu, J. R. Wang, Q. Zhang, M. Li, C. Guo, G. Ren, and X. Mei, *Cryst. Growth Des.*, 2018, **18**, 4701–4714.
- 5 F. Y. Wang, Q. Zhang, Z. Zhang, X. Gong, J. R. Wang, X. Mei, *CrystEngComm.*, 2018, **20**, 5945–5948.
- 6 M. Yoshimura, M. Miyake, T. Kawato, M. Bando, M. Toda, Y. Kato, T. Fukami and T. Ozeki, *Cryst. Growth Des.*, 2017, **17**, 550–557.
- 7 M. Aljohani, A. R. Pallipurath, P. McArdle and A. Erxleben, *Cryst. Growth Des.*, 2017, **17**, 5223–5232.

- 8 E. V. Gonzaga, S. S. Vieira, J. L. J. Vilaca, M. Guerra, M. G. Evangelista, I. M. L. Rosa, M.M. Figueiredo, O. M. M. S. Viana and A. C. Doriguetto, *Cryst. Growth Des.*, 2019, **19**, 737–746.
- 9 A. Ainurofiq, R. Mauludin, D. Mudhakhir, D. Umeda, S. N. Soewandhi, O. D. Putra and E. Yonemochi, *Eur. J. Pharm. Sci.* 2018, **111**, 65–72.
- 10 W. Guo, S. Du, Y. Lin, B. Lu, C. Yang, J. Wang and Y. Zeng, *New J. Chem.*, 2018, **42**, 15068–15078.
- 11 M. K. Bommaka, M. K. C. Mannava, K. Suresh, A. Gunnam and A. Nangia, *Cryst. Growth Des.*, 2018, **18**, 6061–6069.
- 12 O. D. Putra, D. Umeda, Y. P. Nugraha, T. Furuishi, H. Nagase, K. Fukuzawa, H. Uekusa and E. Yonemochi, *CrystEngComm.*, 2017, **19**, 2614–2622.
- 13 O. D. Putra, D. Umeda, Y. P. Nugraha, K. Nango, E. Yonemochi and H. Uekusa, *Cryst. Growth Des.*, 2018, **18**, 373–379.
- 14 Y. Kang, J. Gu and X. Hu, *J. Mol. Struct.*, 2017, **1130**, 480–486.
- 15 X. R. Zhang and L. Zhang, *J. Mol. Struct.*, 2017, **1137**, 328–334.
- 16 L. Gao, X. R. Zhang, Y. F. Chen, Z. L. Liao, Y. Q. Wang and X. Y. Zou, *J. Mol. Struct.*, 2019, **1176**, 633–640.
- 17 L. F. Diniz, P. S. Carvalho, S. A. C. Pena, J. E. Gonçalves, M. A. C. Souza, J. D. de Souza Filho, L. F. O. Bomfim Filho, C. H. J. Franco, R. Diniz and C. Fernandes, *Int J Pharm*, 2020, **587**, 119694.
- 18 J. A. Miranda, C. Garnerio, A. K. Chattah, Y. S. Oliveira, A. P. Ayala and M. R. Longhi, *Cryst. Growth Des.*, 2019, **19**, 2060–2068.
- 19 P. Goyal, D. Rani and R. Chadha, *Cryst. Growth Des.*, 2018, **18**, 105–118.
- 20 A. L. M. Viana, A. C. Doriguetto, O. M. M. S. Viana, A. L. M. Ruela, J. T. J. Freitas, B. E. M. Souto, M. B. Araújo and F. B. A. Paula, *Int. J. Pharm.*, 2018, **553**, 272–280.
- 21 L. Y. Wang, F. Z. Bu, Y. T. Li, Z. Y. Wu, C. W. Yan, *Cryst. Growth Des.*, 2020, **20**, 3236–3246.
- 22 Q. Fu, H. D. Lu, Y. F. Xie, J. Y. Liu, Y. Han, N. B. Gong and F. Guo, *J. Mol. Struct.*, 2019, **1185**, 281–289.
- 23 X. Chen, D. Li, Z. Deng and H. Zhang, *Cryst. Growth Des.*, 2020, **20**, 6973–6982.
- 24 J. Cadden, W. T. Klooster, S. J. Coles and S. Aitipamula, *Cryst. Growth Des.*, 2019, **19**, 3923–3933.
- 25 X. Chen, D. Li, J. Wang, Z. Deng and H. Zhang, *J. Mol. Struct.*, 2019, **1175**, 852–857.
- 26 P. K. Mondal, V. Rao, S. Mittapalli and D. Chopra, *Cryst. Growth Des.*, 2017, **17**, 1938–1946.

- 27 M. Alsubaie, M. Aljohani, A. Erxleben and P. McArdle, *Cryst. Growth Des.*, 2018, **18**, 3902–3912.
- 28 A. Gunnam and A. K. Nangia, *Cryst. Growth Des.*, 2019, **19**, 5407–5417.
- 29 J. Haneef, P. Arora and R. Chadha, *AAPS PharmSciTech.*, 2020, **21**. DOI: 10.1208/s12249-019-1559-9.
- 30 O. E. Fandiño, L. Reviglio, Y. G. Linck, G. A. Monti, M. M. Marcos Valdez, S.N. Faudone, M.R. Caira and N. R. Sperandeo, *Cryst. Growth Des.*, 2020, **20**, 2930–2942.
- 31 S. Aitipamula, J. Cadden and P. S. Chow, *CrystEngComm.*, 2018; **20**, 2923–2931.
